# Supplementary material
Source: publisher site journal article supplement (https://www.dovepress.com/article/568648)
Supplement: Supplementary file 1 [file 568648%20Revised%20supplementary%20materials.docx]

**Supplementary Table S1. Definitions of coexisting conditions**

| **Coexisting conditions** | **Operational definition used in this study** |
| --- | --- |
| Malignancy | Active or past solid-organ or hematologic malignant neoplasm documented in the medical record. |
| Autoimmune disease | Any physician-diagnosed autoimmune disorder (e.g., SLE, rheumatoid arthritis, IBD) in which the immune system attacks self-tissues |
| Coronary artery disease | Prior MI, angina, or coronary revascularization or angiographic/CT evidence of ≥1 epicardial coronary artery stenosis ≥ 50% |
| Recent SARS-CoV-2 infection | Positive SARS-CoV-2 PCR/antigen test within 6 months before index admission |
| Cerebrovascular accident | Documented ischemic or hemorrhagic stroke or transient ischemic attack confirmed by imaging or neurology note |
| Type 2 diabetes mellitus | Physician-documented T2DM or ADA diagnostic criteria met previously (FPG ≥ 126 mg/dL, 2-h OGTT ≥ 200 mg/dL, HbA1c ≥ 6.5 %, or random glucose ≥ 200 mg/dL + symptoms) |
| Heart failure | Clinical diagnosis of HF (HFrEF, HFmrEF, or HFpEF) consistent with ACC/AHA/HFSA guideline |
| HIV infection | Confirmed HIV-1/2 infection by reactive Ag/Ab combination assay and supplemental differentiation test or detectable HIV RNA |
| Immunosuppressant used | Current or recent (≤30 days) systemic immunosuppressive therapy, including ≥20 mg/day prednisone-equivalent for ≥2 weeks, calcineurin inhibitors, mTOR inhibitors, antimetabolites, biologics, or JAK inhibitors |
| Chronic liver disease | Progressive hepatic parenchymal disease lasting > 6 months (e.g., chronic hepatitis B/C, NAFLD, alcoholic liver disease, cirrhosis) |
| Chronic kidney disease | eGFR < 60 mL/min/1.73 m² or markers of kidney damage (e.g., albuminuria ≥ 30 mg/g) present for ≥ 3 months (KDIGO 2024 criteria) |
| Chronic lung disease | Physician-diagnosed chronic respiratory disorder causing persistent airflow limitation or parenchymal damage (COPD, asthma, ILD, bronchiectasis, etc.) |
| Post-transplant status | History of solid-organ or hematopoietic stem-cell transplantation with ongoing immunosuppression. |

**Supplementary Table S2. Detailed laboratory and biochemical parameters of patients with pulmonary mucormycosis, excluding variables presented in Table 1.**

|  | All Patients (n=163) | Malignancy  (n=74) | Non-malignancy  (n=89) | p valuea |
| --- | --- | --- | --- | --- |
| Neutrophil percentage (%) (segmented + band forms) | 75.18±19.77 | 68.56±25.17 | 80.71±11.22 | <0.001 |
| Lymphocyte percentage (%) | 14.86±13.42 | 18.30±16.83 | 12.01±8.85 | 0.003 |
| Alanine aminotransferase (U/L) | 33.36±27.47 | 36.30±32.05 | 30.92±22.90 | 0.217 |
| Aspartate aminotransferase (U/L) | 37.34±30.59 | 42.55±39.78 | 32.55±17.50 | 0.05 |
| Total bilirubin (mg/dL) | 1.00±1.91 | 1.29±2.20 | 0.75±1.60 | 0.078 |
| Direct (conjugated) bilirubin (mg/dL) | 0.70±1.58 | 0.94±1.89 | 0.43±1.10 | 0.113 |
| Alkaline phosphatase (U/L) | 124.63±98.56 | 140.02±113.79 | 109.23±78.43 | 0.077 |
| Serum albumin (g/dL) | 3.10±0.61 | 3.06±0.68 | 3.14±0.56 | 0.484 |
| Serum sodium (mEq/L) | 138.14±5.34 | 138.16±5.35 | 138.12±5.36 | 0.964 |
| Serum potassium (mEq/L) | 3.82±0.61 | 3.68±0.56 | 3.94±0.62 | 0.006 |
| Serum calcium (mg/dL) | 8.32±0.96 | 8.33±1.22 | 8.31±0.66 | 0.939 |
| HbA1c (%) | 6.61±1.32 | 6.54±1.08 | 6.66±1.44 | 0.664 |

Values are presented as mean ± standard deviation.

Abbreviations: ALP, alkaline phosphatase; AST, aspartate aminotransferase; ALT, alanine aminotransferase; LDH, lactate dehydrogenase; NLR, neutrophil-to-lymphocyte ratio; CRP, C-reactive protein; PCT, procalcitonin.

1. P values for continuous variables were calculated using independent-samples t tests, while those for categorical variables were determined with the χ² test; all p values denote comparisons between the Malignancy and Non-malignancy groups.

**Supplementary Table S3. Cox proportional hazards model of risk factors for 30-day mortality.**

|  | Univariable HR (95% CI)a | p value |
| --- | --- | --- |
| Patient and clinical characteristics | | |
| Age (per year↑) | 1.01(0.99-1.04) | 0.347 |
| Male (vs female) | 0.57 (0.26–1.24) | 0.156 |
| Coexisting conditions | | |
| Malignancy | 2.98 (1.36–6.51) | 0.006 |
| Immunosuppressant used | 1.94(0.92-4.08) | 0.080 |
| Autoimmune disease | 0.37 (0.09–1.56) | 0.176 |
| Coronary artery disease | 0.25(0.03-1.81) | 0.169 |
| Recent SARS-CoV-2 infection | 0.74(0.36-1.53) | 0.415 |
| Cerebrovascular accident | 1.16(0.41-3.33) | 0.779 |
| Type 2 diabetes mellitus | 1.78(0.87-3.65) | 0.115 |
| Heart failure | 0.24(0.03-1.76) | 0.160 |
| HIV infection | HR not estimable due to sparse data | |
| Chronic liver disease | 5.76(2.35-14.11) | <0.001 |
| Chronic kidney disease | 1.20(0.53-2.69) | 0.665 |
| Chronic lung disease | 0.67(0.26-1.76) | 0.419 |
| Post-transplant status | 1.68(0.59-4.81) | 0.335 |
| Clinical Characteristics | | |
| Clinical condition(yes vs no) | | |
| Acute kidney injury | 2.07(1.01-4.25) | 0.046 |
| Antifungal therapy received | 2.67(1.30-5.46) | 0.007 |
| Laboratory value | | |
| Leukocytosis/Leukopenia | 2.23(1.04-4.76) | 0.039 |
| Anemia | 7.53(1.03-55.28) | 0.047 |
| Thrombocytopenia | 3.77(1.68-8.48) | 0.001 |
| Neutrophil percentage (segmented + band forms) | 1.00(0.98-1.02) | 0.830 |
| Lymphocyte percentage | 1.00(0.97-1.03) | 0.954 |
| Neutrophil-to-lymphocyte ratio (per 5 units)b | 1.10(1.05–1.22) | 0.001 |
| Alanine aminotransferase | 1.01(0.997-1.02) | 0.134 |
| Aspartate aminotransferase | 1.01(1.004-1.02) | 0.003 |
| Total bilirubin | 1.21(1.09-1.35) | <0.001 |
| Direct bilirubin | 1.18(1.01-1.39) | 0.04 |
| Alkaline phosphatase (per 50 U/L)b | 1.16(1.00–1.64) | <0.001 |
| Serum albumin | 0.39(0.20-0.74) | 0.004 |
| Blood urea nitrogen | 1.01(0.996-1.02) | 0.171 |
| Serum creatinine | 0.99(0.82-1.20) | 0.903 |
| Serum sodium | 1.04(0.97-1.11) | 0.314 |
| Serum potassium | 1.50(0.82-2.74) | 0.184 |
| Serum calcium | 0.63(0.36-1.10) | 0.103 |
| C-reactive protein | 1.02(0.98-1.06) | 0.410 |
| Procalcitonin | 1.02(0.995-1.05) | 0.115 |
| HbA1c | 1.05(0.66-1.66) | 0.840 |

1. All hazard ratios (HRs) were estimated from univariable Cox proportional hazards models. Binary variables were coded as 1 = yes, 0 = no
2. Continuous variables were scaled to clinically meaningful increments (NLR per 5 units, ALP per 50 U/L).

**Supplementary Table S4.** **Covariates included in the multivariable Cox proportional hazards model for 30-day mortality.**

| Step | Variables in the modela | Removed (p > 0.15 or Δβ < 10%) a | –2 LL | AIC |
| --- | --- | --- | --- | --- |
| 0 | 13 candidate variablesb | - | 156.909 | 182.9 |
| 1-a | 12 candidate variables | Serum albumin | 168.99 | 192.99 |
| 1-b | 13 candidate variables | - | 156.909 | 182.9 |
| 2 | 12 candidate variables | Leukocytosis/Leukopenia | 156.989 | 180.989 |
| 3 | 11 candidate variables | Aspartate aminotransferase | 166.314 | 188.314 |
| 4 | 10 candidate variables | Thrombocytopenia | 166.315 | 186.315 |
| 5-a | 9 candidate variables | Alkaline phosphatase | 200.761 | 218.761 |
| 5-b | 10 candidate variables | - | 166.315 | 186.315 |
| 6 | 9 candidate variables | Antifungal therapy received | 168.038 | 186.038 |
| 7 | 8 candidate variables | Chronic liver disease | 168.185 | 184.185 |
| 8 | 7 candidate variables | Direct bilirubin | 192.169 | 206.169 |
| 9-a | 6 candidate variables | Alkaline phosphatase | 242.435 | 254.435 |
| 9-b | 7 candidate variables | - |  |  |
| 10 | 6 candidate variables | Direct bilirubin | 192.878 | 204.878 |
| 11 | 5 candidate variables | Anemia | 194.522 | 204.522 |

1. Variables with p < 0.10 in univariable analysis were entered; variables with p > 0.15 were sequentially removed unless their removal changed any remaining β coefficients by ≥10 %. The proportional-hazards assumption was verified using Schoenfeld residuals (all p > 0.05).
2. 13 candidate variables including: malignancy, chronic liver disease, acute kidney injury, thrombocytopenia, leukocytosis/leukopenia, anemia, neutrophil-to-lymphocyte ratio, aspartate aminotransferase, total bilirubin, direct bilirubin, alkaline phosphatase, serum albumin, and antifungal therapy received.
